# Supplementary material for: Comparing cellular performance of Yarrowia lipolytica during growth on glucose and glycerol in submerged cultivations
Source: PubMed Central journal article supplement (PMC3852309; doi:10.1186/2191-0855-3-58), 2013-10-03

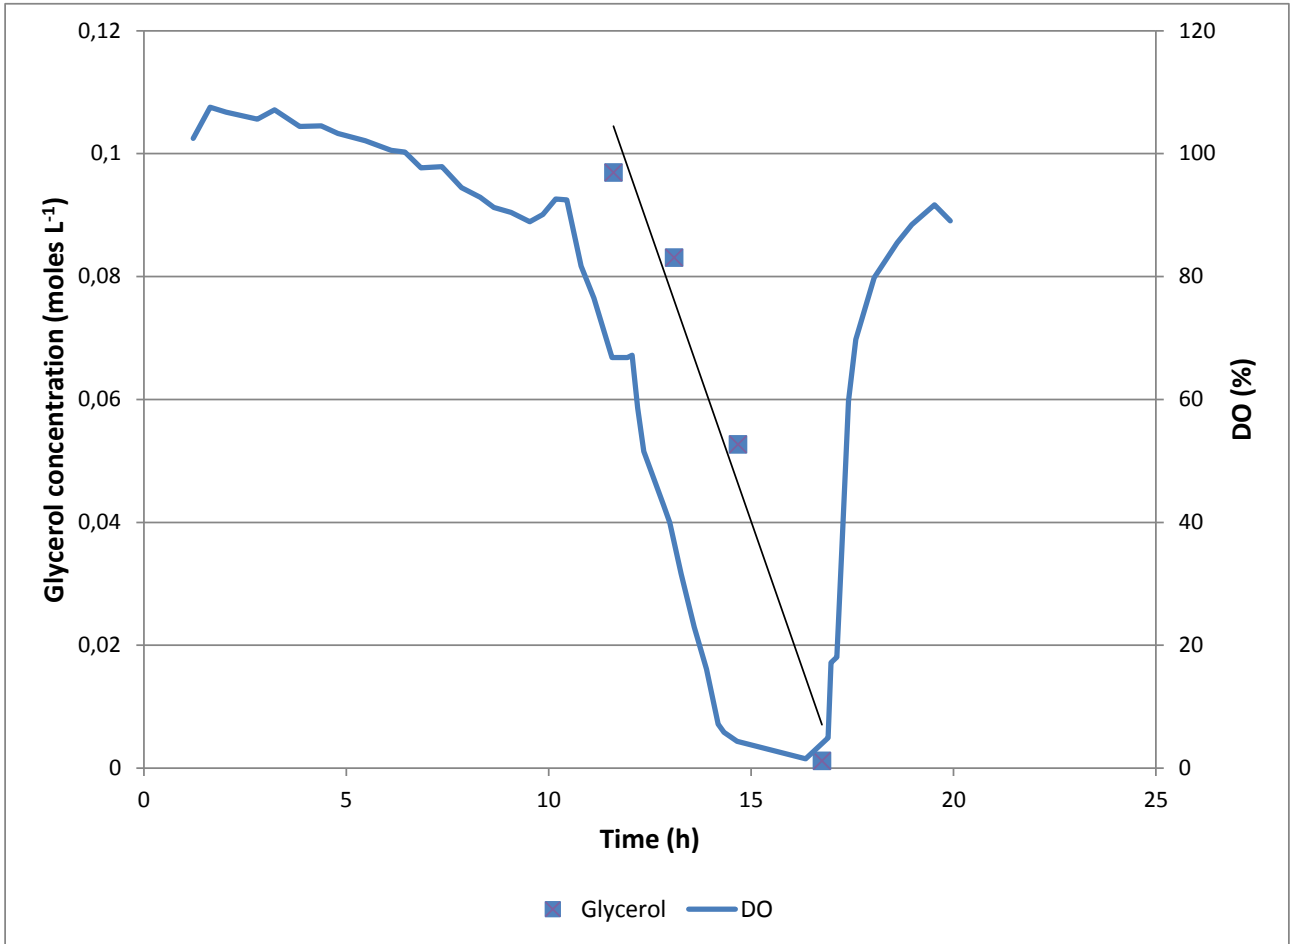

Supplement: 2191-0855-3-58-S2.pdf [file 2191-0855-3-58-S2.pdf]
